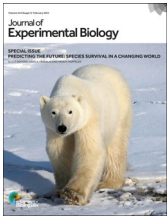

**Cover:** Marine mammal specialists, such as polar bears, are reaching their physiological limits in responding to a rapidly changing Arctic. Pagano and Williams (jeb228049) review the unique physiologies of polar bears and narwhals that have enabled them to survive on top and below the Arctic sea ice. In response to climate change, polar bears are increasingly reliant on aquatic locomotion and summer land use, while narwhals are at increased risk of anthropogenic disturbance and predation from killer whales. Both species are likely to be energetically challenged by continued warming that will disrupt their ability to capture preferred prey. Photo credit: Anthony M. Pagano.

## SPECIAL ISSUE Predicting the Future: Species Survival in a Changing World

Guest Editors: Craig E. Franklin and Hans H. Hoppeler

### INSIDE JEB

Making a difference: the role of comparative biology in tackling climate change

**Knight, K.**

jeb242381

### EDITORIAL

Elucidating mechanism is important in forecasting the impact of a changing world on species survival

**Franklin, C. E. and Hoppeler, H. H.**

jeb242284

### REVIEWS

Climate impacts on organisms, ecosystems and human societies: integrating OCLTT into a wider context

**Pörtner, H.-O.**

jeb238360

Physiological adaptation to cities as a proxy to forecast global-scale responses to climate change

**Diamond, S. E. and Martin, R. A.**

jeb229336

Towards more integration of physiology, dispersal and land-use change to understand the responses of species to climate change

**Hof, C.**

jeb238352

Shifts in the relative fitness contributions of fecundity and survival in variable and changing environments

**Buckley, L. B., Schoville, S. D. and Williams, C. M.**

jeb228031

Predicting the effects of climate change on incubation in reptiles: methodological advances and new directions

**Carter, A. L. and Janzen, F. J.**

jeb236018

Diving in hot water: a meta-analytic review of how diving vertebrate ectotherms will fare in a warmer world

**Rodgers, E. M., Franklin, C. E. and Noble, D. W. A.**

jeb228213

How dryland mammals will respond to climate change: the effects of body size, heat load and a lack of food and water

**Fuller, A., Mitchell, D., Maloney, S. K., Hetem, R. S.,  
Fonsêca, V. F. C., Meyer, L. C. R., van de Ven, T. M. F. N.  
and Snelling, E. P.**

jeb238113

Physiological consequences of Arctic sea ice loss on large marine carnivores: unique responses by polar bears and narwhals

**Pagano, A. M. and Williams, T. M.**

jeb228049

Thermoregulation in desert birds: scaling and phylogenetic variation in heat tolerance and evaporative cooling

**McKechnie, A. E., Gerson, A. R. and Wolf, B. O.**

jeb229211

Dealing with predictable and unpredictable temperatures in a climate change context: the case of parasitoids and their hosts

**Le Lann, C., van Baaren, J. and Visser, B.**

jeb238626

The role of mechanistic physiology in investigating impacts of global warming on fishes

**Lefevre, S., Wang, T. and McKenzie, D. J.**

jeb238840

Bioenergetics in environmental adaptation and stress tolerance of aquatic ectotherms: linking physiology and ecology in a multi-stressor landscape

**Sokolova, I.**

jeb236802

Avenues of reef-building coral acclimatization in response to rapid environmental change

**Putnam, H. M.**

jeb239319
